# Supplementary material for: Baseflow in karst regions is significantly higher than the global average and exhibits spatial variability
Source: Copernicus journal article supplement (doi:10.5194/egusphere-2025-2843), 2025-07-28
Supplement: Supplementary file [file egusphere-2025-2843-CC2-supplement.pdf]

Thank you very much for your recognition of our article and your constructive comments and suggestions. We have carefully studied and fully understood all your suggestions, and will revise and improve the article in accordance with these suggestions to enhance its quality. The specific revision plans are as follows:

Lines 68-71. Insert new and recent literature for fissures and pipes in karstic dolostones and limestones

Reply: These two articles conduct research on fissures and pipes in karstic dolostones and limestones, further highlighting the particularity of karst areas. This further corroborates the view that the unique hydrological structure of karst areas makes the base flow characteristics in the region different from those in non-karst areas. Therefore, we will add citations of these two articles and their related works in the subsequent revisions.

Lines 112-113. More detail (e.g., possible ranges and maximum value etc etc) here or in the methodology on KGE and NSE coefficients.

Reply: For more information about the KGE and NSE coefficients, we have already provided explanations in Section 2.2.2 of the methodology. We also realize that the description of the common values and related ranges of these two coefficients lacks some details. Therefore, we will consult relevant materials to further add detailed explanations of the KGE and NSE coefficients.

Line 114. The aim is clear, but you need to specify the 3 to 4 specific objectives of your research by using numbers (e.g., i, ii, iii).

Reply: We will use numbers to further clarify the research objectives.

Line 193. Here you can insert the necessary methodological details for KGE and NSE coefficients.

Reply: Consistent with the suggestions in Lines 112-113, we will add more detailed explanations of the KGE and NSE coefficients.

Lines 495. Four points in the discussion. Maybe, four objectives to disclose in the introduction?

Reply: The four points in the discussion are explanations of the phenomena observed during the research process. Although we have not established a one-to-one correspondence between the citations and the discussion, generally speaking, the four points in the discussion roughly correspond to the scientific issues raised in the introduction. However, we are aware that this issue may cause confusion for readers. Therefore, we will further improve the introduction in subsequent revisions to enhance the readability and logical coherence of the article.

Figure and tables

Reply: Regarding the revision of figures and tables, we will make further improvements based on your suggestions combined with the actual situation to enhance their readability and standardization.

Figure 7. I would provide more detail in the introduction on the definitions of the climate. What does it mean "temperate karst". Semi-arid, humid?

Reply: The classification rules adopted here are based on the Köppen climate classification. Temperate climates are characterized by moderate conditions, without the year-round high temperatures of the tropics or the extreme cold of the polar regions, with distinct but not drastic annual temperature differences. Therefore, "temperate karst" in the figure refers to the karst areas under temperate climates. We realize that the description of this part is relatively general, which may lead readers into misunderstandings. Therefore, we will add an introduction to the Köppen climate classification in the methodology section to explain the basis for the classification used in the article.

Figure 8. Please, provide more detail on the description of the results for the (i)  $R^2$ , (ii) NSE and (iii) KGE values which look good.  $R^2$  maybe a bit low, but this is ok.

Reply: We will add descriptions of Figure 8 in Lines 349-354, elaborating on the meanings represented by the NSE and KGE coefficients in the figure.
